# Supplementary material
Source: publisher figshare collection journal article supplement (https://gsajournals.figshare.com/articles/dataset/_/14794824)
Supplement: Supplementary file 1 [file 1]

## Supplemental File 1:

# Step: Creating bit-array of k-mers from the assembled genome

#input file - longipalpis\_both\_v3.fasta

```
jellyfish count -v 1 -m 16 -o longipalpis_v3.jelly -c 4 -s 10G -t 2 --both-strands  
longipalpis_both_v3.fasta
```

```
jellyfish dump --lower-count=2 longipalpis_v3.jelly | gzip -c > longipalpis_v3.vector_rep.gz
```

#####

# Step: Creating bit-array of k-mers from the female reads filtered by sequence quality and frequency

#input file - females reads - LUL\_f\_1.fastq.gz/LUL\_f\_2.fastq.gz

```
gunzip -c LUL_f_*.fastq.gz | \
```

```
jellyfish count -v 1 -m 16 -c 4 -s 10G -t 6 -o longipalpis_fe.jelly --both-strands --quality-start=33 --min-  
quality=20 /dev/fd/0
```

```
jellyfish dump --lower-count=3 longipalpis_fe.jelly | gzip -c > longipalpis_female.vector_rep.gz
```

#Creating bit-arrays: output file produced with the "to\_Hex" function of the Bit::Vector module (<http://search.cpan.org/dist/Bit-Vector>). See its manual for details.

```
perl YGS.pl kmer_size=16 mode=trace trace= longipalpis_female.vector_rep.gz
```

#####

# Step: Creating bit-array of k-mers from the male reads filtered by sequence quality and frequency

#input file - males reads - files: LUL\_m\_1.fastq.gz/LUL\_m\_2.fastq

```
gunzip -c LUL_m_*.fastq.gz | \
```

```
jellyfish count -v 1 -m 16 -c 4 -s 10G -t 6 -o longipalpis_ma.jelly --both-strands --quality-start=33 --  
min-quality=20 /dev/fd/0
```

```
jellyfish dump --lower-count=3 longipalpis_ma.jelly | gzip -c > longipalpis_male.vector_rep.gz
```

#Creating bit-arrays: output file produced with the "to\_Hex" function of the Bit::Vector

```
perl YGS.pl kmer_size=16 mode=trace trace= longipalpis_male.vector_rep.gz
```

#####

# Step: Creating bit-array of k-mers from all reads filtered by sequence quality and frequency for k-

mer validation

```
#input file - all reads - files: LUL_m_1.fastq.gz/LUL_m_2.fastq/LUL_f_1.fastq.gz/LUL_f_2.fastq.gz
```

```
gunzip -c LUL_*.fastq.gz.gz | \
```

```
jellyfish count -v 1-m 16 -c 4 -s 10G -t 6 -o longipalpis_validation.jelly --both-strands --quality-  
start=33 --min-quality=20 /dev/fd/0
```

```
jellyfish dump --lower-count=3 longipalpis_validation.jelly | gzip -c >  
longipalpis_validation.vector_rep.gz
```

```
#Creating bit-arrays: output file produced with the "to_Hex" function of the Bit::Vector
```

```
perl YGS.pl kmer_size=16 mode=trace trace= longipalpis_validation.vector_rep.gz
```

```
#output: binary file
```

```
#####
```

```
#step= "IDENTIFYING THE Y_SUSPECTS : *.final_result step ( YGS.pl program)"
```

```
# Test for the XY system (see text for more detail): it uses the binary bit-arrays files
```

```
perl YGS.pl kmer_size=16 mode=final_run \
```

```
contig=longipalpis_both_v3.fasta \
```

```
gen_rep=longipalpis_v3.trace.gz \
```

```
trace=longipalpis_female.trace.gz \
```

```
male_trace=longipalpis_validation.trace.gz
```

```
#note that there is a variable called "male_trace" that comes from the original paper (Carvalho & Clark,  
2013) but does not denote male traces in the current work.
```

```
#It denotes the bitarray of valid k-mers from both male and female reads.
```

```
# Test for the ZW system (see text for more detail)
```

```
perl YGS.pl kmer_size=16 mode=final_run \
```

```
contig=longipalpis_both_v3.fasta \
```

```
gen_rep=longipalpis_v3.trace.gz \
```

```
trace=longipalpis_male.trace.gz \
```

```
male_trace=longipalpis_validation.trace.gz
```

```
#note that there is a variable called "male_trace" that comes from the original paper (Carvalho & Clark,  
2013) but does not denote male traces in the current work.
```

```
#It denotes the bitarray of valid k-mers from both male and female reads.
```
