# Supplementary material
Source: publisher figshare collection journal article supplement (https://gsajournals.figshare.com/articles/dataset/_/14794824)
Supplement: Supplementary file 2 [file 1]

## Supplemental File 2:

### Practical guide on using YGS

What follows is practical summary, adding also more recent data. Readers should consult the original paper <sup>35</sup> for in depth discussion of the YGS method, including its pitfalls.

#### A) Assembly quality

Well assembled genomes usually yield clean YGS results (see also the next section). Assembly fragmentation produce many small scaffolds that can be difficult to reliably classify as Y / not-Y.

Another source of assembly problems is polymorphism in the sample. Samples with high genetic variation yield poorer assemblies, which translates into a lot of overlap in YGS. Ideally you should use an inbred strain, obtained by brother-sister mating for up to 20 generations. If this is not feasible (as is the case of *L. longipalpis s.l.*), individuals from colony are preferable.

#### B) Choice of the cut-off for candidate Y-linked scaffolds.

One point that can be tricky is the choice of the cut-off for candidate Y-linked scaffolds (we used 70% unmatched *k-mer*). Well assembled genomes usually yields two sharply separated peaks in YGS (Y and X+A), with little or no overlap (see Figs 2A and 3A in <sup>35</sup>); in this case the proper cut-off is self-evident. However, a less optimal assembly of the same species can have a significant amount of overlap (Fig S14A in <sup>35</sup>), and in these cases the choice of cut-off point should be based on the trade-off between false-positives and false-negatives. The use of a cut-off of 50% instead of 70% we would very likely get some additional real Y-linked sequences, at the cost of including some or many autosomal or X-linked sequences. Since the

main objective of the present paper was to identify the sex-determination system, we opted for a fairly stringent cut-off. If the purpose was to identify most of the Y-linked sequences a lower cut-of (always followed by PCR confirmation) would be more appropriate.
