# Supplementary material
Source: publisher figshare collection journal article supplement (https://gsajournals.figshare.com/articles/dataset/_/14794824)
Supplement: Supplementary file 3 [file 1]

**Supplemental Table 3:**

Table comparing genomes and Y linked scaffold in different *Drosophila* species determined with YGS.

| <b>Espécie</b>                | <b>Genome size (MB)</b> | <b>scaffolds</b> | <b>Y scaffolds size (MB)</b> | <b>Y linked scaffolds</b> | <b>Source</b>          |
|-------------------------------|-------------------------|------------------|------------------------------|---------------------------|------------------------|
| <i>D.ananassae</i>            | 214                     | 13,749           | 18.8                         | 3,728                     | Goldstein, 2016        |
| <i>D.mojavensis</i>           | 180                     | 6,841            | 13                           | 2,401                     | Goldstein, 2016        |
| <i>D.yakuba</i>               | 162                     | 8,122            | 8                            | 1,715                     | Goldstein, 2016        |
| <i>D.erecta</i>               | 145                     | 5,124            | 11                           | 1,657                     | Goldstein, 2016        |
| <i>D.pseudoobscura</i>        | 192                     | 39,338           | 3.4                          | 10,093                    | Goldstein, 2016        |
| <i>D.melanogaster</i><br>(R6) | 142                     | 1870             | 13.4                         | 776                       | Goldstein, 2016        |
| <i>D. virilis</i>             | 170                     | 13,530           | 8.5                          | 1186                      | Carvalho & Clark, 2013 |

Carvalho AB, Clark AG. 2013. Efficient identification of y chromosome sequences in the human and drosophila genomes. *Genome Research*. 23(11):1894-1907.

Goldstein GNR. 2016. Identificação de sequências ligadas ao cromossomo y no gênero drosophila. Universidade Federal do Rio de Janeiro.
