# Supplementary material
Source: publisher figshare collection journal article supplement (https://gsajournals.figshare.com/articles/dataset/_/14794824)
Supplement: Supplementary file 4 [file 1]

**Supplemental Table 2:**

Candidate Y-linked scaffolds of *L. longipalpis s.l.* which showed Blast hits with a *D. melanogaster* gene. Note that there is no clear pattern which could suggest the origin of the *L. longipalpis* Y-chromosome.

| Scaffold ID | % of unmatched k-mers | <i>D. melanogaster</i> ortholog | Muller element |
|-------------|-----------------------|---------------------------------|----------------|
| 19450       | 92.6                  | <i>Fpps</i>                     | C              |
| 31567       | 74.2                  | <i>Fpps</i>                     | C              |
| 14019       | 83.5                  | <i>Ac13E</i>                    | A              |
| 30324       | 87.2                  | <i>CG3523</i>                   | B              |
| 22552       | 88.7                  | <i>Got2</i>                     | B              |
| 24171       | 84.7                  | <i>CG1236</i>                   | E              |
| 24171       | 84.7                  | <i>CG9331</i>                   | B              |
| 23976       | 88.2                  | <i>CG2256</i>                   | A              |
| 23053       | 85.4                  | <i>pigeon</i>                   | B              |
| 18485       | 91.7                  | <i>proPO45</i>                  | C              |
| 30018       | 85.4                  | <i>spel1</i>                    | B              |
