# Supplementary material
Source: publisher figshare collection journal article supplement (https://gsajournals.figshare.com/articles/dataset/_/14794824)
Supplement: Supplementary file 6 [file 1]

**Supplemental Table 1:**

Primers used to test Y linkage. All PCR runs were performed using an annealing temperature of 50°C.

|             | Foward                   | Reverse                        | expected size<br>(bp) |
|-------------|--------------------------|--------------------------------|-----------------------|
| GR52        | TCAAATAGGGGAAAAGGGATTATA | ATTATTAGTTGTGCATCAAGAATTATAAGA | 426                   |
| proPO45     | ATATTCAGTAGTTTGGCACGTGT  | CTTCGAAGCTTTTCATAGGTTGA        | 200                   |
| CG2256      | TTCTTACTCGTTAGATTAAGGCCT | TTTTCTTGTAATGTGATTATGGTAGGT    | 361                   |
| scaff_13589 | CATTCCTTGCTACCCAGGAT     | TTGCATGATTTGGAAGGCTG           | 535                   |
| scaff_6545  | GCACAATGATGTTCCGTGAA     | GACCCTCTAAGGCTTAGCAG           | 369                   |
| scaff_24477 | GAGGGCTCCAAGGCAAAA       | AAGCCATTCGTTGTCAATACA          | 481                   |
